# Supplementary material for: Factors influencing French community pharmacists’ willingness to participate in research projects: a mixed method study
Source: Springer Nature journal article supplement (doi:10.1186/s12875-023-02163-w), 2023-11-03
Supplement: MOESM3 [file 26261334]

# Enquête RecOFF

La recherche en officine se développe avec des projets de plus en plus ambitieux comme l'évaluation de l'impact du bilan de médication sur les hospitalisations, ou l'évaluation de la prise en charge de la cystite simple par le pharmacien. À travers ce questionnaire, nous vous interrogeons sur votre implication et sur votre vision de la recherche en officine.

Ce questionnaire doit être complété dans un premier temps par l'étudiant en 6ème année, puis par le maître de stage avec l'étudiant. Il peut être également complété par d'autres pharmaciens de l'équipe.

La durée du questionnaire est de 10 minutes.

\* Obligatoire

## Votre situation

### 1. Vous êtes \*

Une femme

Un homme

## 2. Vous avez \*

- Entre 20 et 30 ans
- Entre 31 et 40 ans
- Entre 41 et 50 ans
- Entre 51 et 60 ans
- Plus de 60 ans

## 3. Vous êtes \*

- Etudiant.e en pharmacie
- Pharmacien adjoint
- Pharmacien titulaire

## Votre formation

### 4. Vous dépendez de \*

- La faculté de pharmacie d'Angers
- La faculté de pharmacie de Nantes

## Votre expérience

### 5. Vous exercez en officine depuis \*

- Moins de 5 ans
- Entre 5 et 10 ans
- Entre 11 et 20 ans
- Entre 21 et 30 ans
- Plus de 30 ans

### 6. Votre pharmacie est située \*

- En milieu rural
- En milieu urbain

## Votre pharmacie

### 7. Vous exercez en officine depuis \*

- Moins de 5 ans
- Entre 5 et 10 ans
- Entre 11 et 20 ans
- Entre 21 et 30 ans
- Plus de 30 ans

### 8. Votre pharmacie est située \*

- En milieu rural
- En quartier
- En ville
- Entre centre commercial
- Autre

9. Le nombre de pharmaciens équivalent temps plein (ETP) dans l'officine est de \*

10. Le chiffre d'affaire de la pharmacie (en euros) est \*

- Inférieur à 500.000
- Entre 500.000 et 1 million
- Entre 1 million et 2 millions
- Entre 2 millions et 3 millions
- Plus de 3 millions

## Participation antérieure à des projets de recherche

11. Avez-vous déjà participé à des projets de recherche en officine ? \*

Pour rappel, la participation à des questionnaires de thèses n'est pas inclus dans le terme "projets de recherche".

Oui

Non

12. Quels sont les projets auxquels vous avez participé ? \*

13. Qui étai(en)t le(s) porteur(s) de ce(s) projet(s) de recherche ? \*

14. Comment avez-vous été sollicité pour participer ? \*

## La recherche pour vous

15. Pour chacune des affirmations suivantes, veuillez donner votre degré d'accord. \*

|                                                                                                  | Pas du tout d'accord  | Pas d'accord          | Ni d'accord, ni en désaccord | D'accord              | Tout à fait d'accord  |
|--------------------------------------------------------------------------------------------------|-----------------------|-----------------------|------------------------------|-----------------------|-----------------------|
| Je souhaiterais que la pharmacie dans laquelle je travaille participe activement à la recherche. | <input type="radio"/> | <input type="radio"/> | <input type="radio"/>        | <input type="radio"/> | <input type="radio"/> |
| Je participerais à la recherche si j'ai un intérêt particulier pour le sujet spécifique étudié.  | <input type="radio"/> | <input type="radio"/> | <input type="radio"/>        | <input type="radio"/> | <input type="radio"/> |
| J'aimerais participer activement à l'élaboration de nouvelles idées pour de futures recherches.  | <input type="radio"/> | <input type="radio"/> | <input type="radio"/>        | <input type="radio"/> | <input type="radio"/> |
| J'aimerais participer activement à l'élaboration de                                              | <input type="radio"/> | <input type="radio"/> | <input type="radio"/>        | <input type="radio"/> | <input type="radio"/> |



méthodologie  
des projets  
de recherche.

J'aimerais  
participer  
activement à  
des  
recherches  
qui, selon  
moi,  
profiteraient  
à mes  
patients.

Participer  
activement à  
une  
recherche me  
donnerait  
l'occasion de  
faire quelque  
chose qui  
sort de  
l'ordinaire  
dans ma  
pharmacie.

Participer  
activement à  
la recherche  
améliorerait  
la perception  
de la  
pharmacie  
par la  
population.

Promouvoir  
ma  
participation  
à la  
recherche  
universitaire  
favoriserait  
mon officine  
au niveau  
économique.

L'engagement  
dans la  
démarche  
qualité et

Mais la  
formation  
sont  
importants  
pour moi.

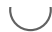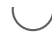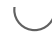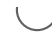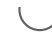

16. Pour chacune des affirmations suivantes, veuillez donner votre degré d'accord. \*

|                                                                                                                      | Pas du tout<br>d'accord | Pas<br>d'accord       | Ni d'accord,<br>ni en<br>désaccord | D'accord              | Tout à fait<br>d'accord |
|----------------------------------------------------------------------------------------------------------------------|-------------------------|-----------------------|------------------------------------|-----------------------|-------------------------|
| Je pense que la pharmacie devrait être indemnisée pour la participation à la recherche.                              | <input type="radio"/>   | <input type="radio"/> | <input type="radio"/>              | <input type="radio"/> | <input type="radio"/>   |
| Les pharmaciens devraient être rémunérés pour leur participation.                                                    | <input type="radio"/>   | <input type="radio"/> | <input type="radio"/>              | <input type="radio"/> | <input type="radio"/>   |
| Les patients qui participent devraient recevoir des incitations autres qu'une éventuelle amélioration de leur santé. | <input type="radio"/>   | <input type="radio"/> | <input type="radio"/>              | <input type="radio"/> | <input type="radio"/>   |
| Je pense qu'il est important que la recherche se déroule au sein de la pharmacie d'officine.                         | <input type="radio"/>   | <input type="radio"/> | <input type="radio"/>              | <input type="radio"/> | <input type="radio"/>   |

Je suis assez confiant dans ma capacité à mener des recherches dans ma pratique quotidienne.

Si je participais à une recherche, je souhaiterais avoir des contacts fréquents avec les chercheurs.

Pendant la recherche, j'aimerais pouvoir contacter des pharmaciens plus expérimentés .

Je souhaiterais recevoir une formation approfondie sur l'organisation de la recherche.

17. Pour chacune des affirmations suivantes, veuillez donner votre degré d'accord. \*

Pas du tout d'accord      Pas d'accord      Ni d'accord, ni en désaccord      D'accord      Tout à fait d'accord

Pendant la recherche

recherche,  
j'aimerais  
être impliqué  
avec d'autres  
professionnel  
s.

Il serait  
important  
que la  
recherche ait  
un objectif  
clair et  
significatif.

Il serait  
important  
que les  
résultats  
soient  
directement  
applicables à  
ma  
pharmacie.

Il serait  
important  
que les  
chercheurs  
m'informent  
des résultats  
de l'étude.

La plupart  
des projets  
me semblent  
difficiles car  
ils  
nécessitent  
une  
réorganisatio  
n de la  
pharmacie.

J'estime qu'il  
est difficile  
d'intéresser  
les patients à  
participer à la  
recherche.

Je pense que  
les

contraintes de temps m'empêchent de participer à des projets de recherche.

J'estime que le manque de personnel qualifié est une raison pour laquelle il est difficile de mener des recherches dans ma pharmacie.

J'ai l'impression que les autres professionnels de la santé ne valorisent pas la recherche en pharmacie.

J'estime avoir besoin d'une formation approfondie avant de conduire des recherches

## Disponibilité pour un entretien

Nous souhaitons compléter l'étude par des entretiens pour explorer les déterminants de la participation à la recherche par les pharmaciens. Ce sont des entretiens individuels semi-dirigés d'environ 30 minutes enregistrés vocalement.

18. Si vous êtes disponible pour un entretien, merci d'indiquer votre adresse mail et nous prendrons contact avec vous par la suite

---

Ce contenu n'a pas été créé ni n'est approuvé par Microsoft. Les données que vous soumettez sont envoyées au propriétaire du formulaire.

 Microsoft Forms
